# Supplementary material for: Selectivity and activity in catalytic hydrogenation of azido groups over Pd nanoparticles on aluminum oxy-hydroxide
Source: Royal Society of Chemistry journal article supplement (doi:10.1039/c6nj01925k), 2016-01-01
Supplement: c6nj01925k2.pdf [file c6nj01925k2.pdf]

5.015630280 8967.0  
5.041890845 8688.0  
5.068151410 8729.0  
5.094411975 8640.0  
5.120672540 8522.0  
5.146933105 8396.0  
5.173193670 8571.0  
5.199454235 8456.0  
5.225714800 8443.0  
5.251975365 8312.0  
5.278235930 8135.0  
5.304496495 8306.0  
5.330757060 8171.0  
5.357017625 8061.0  
5.383278190 8262.0  
5.409538755 8008.0  
5.435799320 7793.0  
5.462059885 7997.0  
5.488320450 7827.0  
5.514581015 7734.0  
5.540841580 7653.0  
5.567102145 7601.0  
5.593362710 7727.0  
5.619623275 7611.0  
5.645883840 7742.0  
5.672144405 7721.0  
5.698404970 7500.0  
5.724665535 7373.0  
5.750926100 7495.0  
5.777186665 7233.0  
5.803447230 7364.0  
5.829707795 7257.0  
5.855968360 7299.0  
5.882228925 7225.0  
5.908489490 7053.0  
5.934750055 7097.0  
5.961010620 7057.0  
5.987271185 7037.0  
6.013531750 7039.0  
6.039792315 6765.0  
6.066052880 6964.0  
6.092313445 6924.0  
6.118574010 6731.0  
6.144834575 6770.0  
6.171095140 6841.0  
6.197355705 6681.0  
6.223616270 6715.0  
6.249876835 6519.0  
6.276137400 6710.0  
6.302397965 6670.0  
6.328658530 6534.0  
6.354919095 6490.0  
6.381179660 6453.0  
6.407440225 6467.0  
6.433700790 6422.0  
6.459961355 6401.0  
6.486221920 6163.0  
6.512482485 6326.0

6.538743051 6294.0  
6.565003616 6305.0  
6.591264181 6127.0  
6.617524746 6141.0  
6.643785311 6126.0  
6.670045876 6113.0  
6.696306441 5910.0  
6.722567006 6059.0  
6.748827571 6045.0  
6.775088136 6027.0  
6.801348701 6052.0  
6.827609266 5865.0  
6.853869831 5849.0  
6.880130396 5896.0  
6.906390961 5863.0  
6.932651526 5938.0  
6.958912091 5674.0  
6.985172656 5757.0  
7.011433221 5777.0  
7.037693786 5676.0  
7.063954351 5862.0  
7.090214916 5800.0  
7.116475481 5684.0  
7.142736046 5583.0  
7.168996611 5577.0  
7.195257176 5559.0  
7.221517741 5715.0  
7.247778306 5480.0  
7.274038871 5490.0  
7.300299436 5403.0  
7.326560001 5459.0  
7.352820566 5320.0  
7.379081131 5404.0  
7.405341696 5350.0  
7.431602261 5398.0  
7.457862826 5162.0  
7.484123391 5391.0  
7.510383956 5339.0  
7.536644521 5247.0  
7.562905086 5203.0  
7.589165651 5253.0  
7.615426216 5291.0  
7.641686781 5342.0  
7.667947346 5207.0  
7.694207911 5200.0  
7.720468476 5213.0  
7.746729041 5228.0  
7.772989606 5143.0  
7.799250171 5151.0  
7.825510736 5028.0  
7.851771301 5192.0  
7.878031866 5096.0  
7.904292431 5086.0  
7.930552996 5027.0  
7.956813561 4964.0  
7.983074126 4990.0  
8.009334691 5080.0  
8.035595256 5005.0

8.061855821 4971.0  
8.088116386 4909.0  
8.114376951 4860.0  
8.140637516 5015.0  
8.166898081 4856.0  
8.193158646 4795.0  
8.219419211 4935.0  
8.245679776 4879.0  
8.271940341 4852.0  
8.298200906 4826.0  
8.324461471 4976.0  
8.350722036 4731.0  
8.376982601 4810.0  
8.403243166 4696.0  
8.429503731 4726.0  
8.455764296 4779.0  
8.482024861 4786.0  
8.508285426 4795.0  
8.534545991 4644.0  
8.560806556 4765.0  
8.587067121 4721.0  
8.613327686 4588.0  
8.639588251 4666.0  
8.665848816 4660.0  
8.692109381 4775.0  
8.718369946 4575.0  
8.744630511 4662.0  
8.770891076 4665.0  
8.797151641 4553.0  
8.823412206 4665.0  
8.849672771 4611.0  
8.875933336 4578.0  
8.902193901 4671.0  
8.928454466 4557.0  
8.954715031 4716.0  
8.980975596 4675.0  
9.007236161 4459.0  
9.033496726 4604.0  
9.059757291 4503.0  
9.086017856 4487.0  
9.112278421 4546.0  
9.138538986 4544.0  
9.164799551 4653.0  
9.191060116 4505.0  
9.217320681 4441.0  
9.243581246 4496.0  
9.269841811 4542.0  
9.296102376 4528.0  
9.322362941 4477.0  
9.348623506 4499.0  
9.374884071 4523.0  
9.401144636 4420.0  
9.427405201 4488.0  
9.453665766 4557.0  
9.479926331 4575.0  
9.506186896 4473.0  
9.532447462 4433.0  
9.558708027 4387.0

9.584968592 4515.0  
9.611229157 4537.0  
9.637489722 4462.0  
9.663750287 4485.0  
9.690010852 4473.0  
9.716271417 4436.0  
9.742531982 4506.0  
9.768792547 4404.0  
9.795053112 4378.0  
9.821313677 4444.0  
9.847574242 4530.0  
9.873834807 4388.0  
9.900095372 4503.0  
9.926355937 4493.0  
9.952616502 4415.0  
9.978877067 4467.0  
10.005137632 4551.0  
10.031398197 4361.0  
10.057658762 4445.0  
10.083919327 4399.0  
10.110179892 4566.0  
10.136440457 4426.0  
10.162701022 4453.0  
10.188961587 4401.0  
10.215222152 4440.0  
10.241482717 4404.0  
10.267743282 4312.0  
10.294003847 4533.0  
10.320264412 4405.0  
10.346524977 4453.0  
10.372785542 4572.0  
10.399046107 4292.0  
10.425306672 4495.0  
10.451567237 4621.0  
10.477827802 4399.0  
10.504088367 4516.0  
10.530348932 4410.0  
10.556609497 4394.0  
10.582870062 4446.0  
10.609130627 4435.0  
10.635391192 4504.0  
10.661651757 4521.0  
10.687912322 4530.0  
10.714172887 4577.0  
10.740433452 4519.0  
10.766694017 4377.0  
10.792954582 4419.0  
10.819215147 4536.0  
10.845475712 4458.0  
10.871736277 4462.0  
10.897996842 4435.0  
10.924257407 4572.0  
10.950517972 4619.0  
10.976778537 4521.0  
11.003039102 4519.0  
11.029299667 4542.0  
11.055560232 4530.0  
11.081820797 4716.0

11.108081362 4458.0  
11.134341927 4534.0  
11.160602492 4590.0  
11.186863057 4623.0  
11.213123622 4546.0  
11.239384187 4571.0  
11.265644752 4639.0  
11.291905317 4515.0  
11.318165882 4617.0  
11.344426447 4539.0  
11.370687012 4597.0  
11.396947577 4609.0  
11.423208142 4597.0  
11.449468707 4606.0  
11.475729272 4730.0  
11.501989837 4519.0  
11.528250402 4638.0  
11.554510967 4687.0  
11.580771532 4665.0  
11.607032097 4686.0  
11.633292662 4690.0  
11.659553227 4937.0  
11.685813792 4725.0  
11.712074357 4579.0  
11.738334922 4664.0  
11.764595487 4727.0  
11.790856052 4657.0  
11.817116617 4679.0  
11.843377182 4660.0  
11.869637747 4703.0  
11.895898312 4740.0  
11.922158877 4734.0  
11.948419442 4771.0  
11.974680007 4723.0  
12.000940572 4856.0  
12.027201137 4716.0  
12.053461702 4775.0  
12.079722267 4834.0  
12.105982832 4786.0  
12.132243397 4731.0  
12.158503962 4779.0  
12.184764527 4606.0  
12.211025092 4862.0  
12.237285657 4773.0  
12.263546222 4866.0  
12.289806787 4714.0  
12.316067352 4750.0  
12.342327917 4883.0  
12.368588482 4836.0  
12.394849047 4778.0  
12.421109612 4862.0  
12.447370177 4950.0  
12.473630742 4695.0  
12.499891307 4866.0  
12.526151873 4786.0  
12.552412438 4796.0  
12.578673003 4783.0  
12.604933568 4787.0

12.631194133 4911.0  
12.657454698 4750.0  
12.683715263 4837.0  
12.709975828 4846.0  
12.736236393 4923.0  
12.762496958 4868.0  
12.788757523 4800.0  
12.815018088 4989.0  
12.841278653 4897.0  
12.867539218 4849.0  
12.893799783 4864.0  
12.920060348 4934.0  
12.946320913 4735.0  
12.972581478 4812.0  
12.998842043 4961.0  
13.025102608 4824.0  
13.051363173 4774.0  
13.077623738 4826.0  
13.103884303 4851.0  
13.130144868 4946.0  
13.156405433 4986.0  
13.182665998 4836.0  
13.208926563 4857.0  
13.235187128 5037.0  
13.261447693 4989.0  
13.287708258 4778.0  
13.313968823 4954.0  
13.340229388 4720.0  
13.366489953 4829.0  
13.392750518 4696.0  
13.419011083 4771.0  
13.445271648 4912.0  
13.471532213 4783.0  
13.497792778 4777.0  
13.524053343 4783.0  
13.550313908 4913.0  
13.576574473 4890.0  
13.602835038 4757.0  
13.629095603 4784.0  
13.655356168 4816.0  
13.681616733 4783.0  
13.707877298 4696.0  
13.734137863 4734.0  
13.760398428 4667.0  
13.786658993 4669.0  
13.812919558 4844.0  
13.839180123 4627.0  
13.865440688 4689.0  
13.891701253 4654.0  
13.917961818 4651.0  
13.944222383 4729.0  
13.970482948 4816.0  
13.996743513 4643.0  
14.023004078 4615.0  
14.049264643 4504.0  
14.075525208 4628.0  
14.101785773 4665.0  
14.128046338 4590.0

14.154306903 4657.0  
14.180567468 4543.0  
14.206828033 4631.0  
14.233088598 4472.0  
14.259349163 4475.0  
14.285609728 4538.0  
14.311870293 4641.0  
14.338130858 4412.0  
14.364391423 4550.0  
14.390651988 4543.0  
14.416912553 4363.0  
14.443173118 4559.0  
14.469433683 4451.0  
14.495694248 4432.0  
14.521954813 4375.0  
14.548215378 4483.0  
14.574475943 4446.0  
14.600736508 4396.0  
14.626997073 4327.0  
14.653257638 4369.0  
14.679518203 4339.0  
14.705778768 4398.0  
14.732039333 4319.0  
14.758299898 4344.0  
14.784560463 4344.0  
14.810821028 4249.0  
14.837081593 4222.0  
14.863342158 4289.0  
14.889602723 4150.0  
14.915863288 4219.0  
14.942123853 4251.0  
14.968384418 4135.0  
14.994644983 4151.0  
15.020905548 4056.0  
15.047166113 4146.0  
15.073426678 4019.0  
15.099687243 4196.0  
15.125947808 4091.0  
15.152208373 4026.0  
15.178468938 3840.0  
15.204729503 4000.0  
15.230990068 4009.0  
15.257250633 3813.0  
15.283511198 4127.0  
15.309771763 3874.0  
15.336032328 3930.0  
15.362292893 3958.0  
15.388553458 3795.0  
15.414814023 3938.0  
15.441074588 3748.0  
15.467335153 3803.0  
15.493595718 3824.0  
15.519856284 3727.0  
15.546116849 3767.0  
15.572377414 3653.0  
15.598637979 3678.0  
15.624898544 3791.0  
15.651159109 3726.0

15.677419674 3593.0  
15.703680239 3741.0  
15.729940804 3657.0  
15.756201369 3632.0  
15.782461934 3604.0  
15.808722499 3713.0  
15.834983064 3515.0  
15.861243629 3595.0  
15.887504194 3503.0  
15.913764759 3531.0  
15.940025324 3521.0  
15.966285889 3477.0  
15.992546454 3487.0  
16.018807019 3603.0  
16.045067584 3518.0  
16.071328149 3427.0  
16.097588714 3491.0  
16.123849279 3494.0  
16.150109844 3357.0  
16.176370409 3430.0  
16.202630974 3500.0  
16.228891539 3485.0  
16.255152104 3382.0  
16.281412669 3334.0  
16.307673234 3388.0  
16.333933799 3406.0  
16.360194364 3440.0  
16.386454929 3298.0  
16.412715494 3337.0  
16.438976059 3292.0  
16.465236624 3274.0  
16.491497189 3303.0  
16.517757754 3148.0  
16.544018319 3186.0  
16.570278884 3233.0  
16.596539449 3219.0  
16.622800014 3076.0  
16.649060579 3232.0  
16.675321144 3238.0  
16.701581709 3204.0  
16.727842274 3124.0  
16.754102839 3165.0  
16.780363404 3233.0  
16.806623969 3219.0  
16.832884534 3151.0  
16.859145099 3065.0  
16.885405664 3064.0  
16.911666229 3084.0  
16.937926794 3226.0  
16.964187359 3165.0  
16.990447924 3092.0  
17.016708489 2948.0  
17.042969054 3057.0  
17.069229619 3145.0  
17.095490184 3097.0  
17.121750749 3096.0  
17.148011314 2995.0  
17.174271879 2988.0



17.200532444 2960.0  
17.226793009 3087.0  
17.253053574 3062.0  
17.279314139 3000.0  
17.305574704 2989.0  
17.331835269 2867.0  
17.358095834 3005.0  
17.384356399 2877.0  
17.410616964 2915.0  
17.436877529 2938.0  
17.463138094 2882.0  
17.489398659 2959.0  
17.515659224 2881.0  
17.541919789 2824.0  
17.568180354 2899.0  
17.594440919 2883.0  
17.620701484 2872.0  
17.646962049 2896.0  
17.673222614 2946.0  
17.699483179 2872.0  
17.725743744 2795.0  
17.752004309 2910.0  
17.778264874 3008.0  
17.804525439 2761.0  
17.830786004 2908.0  
17.857046569 2949.0  
17.883307134 2776.0  
17.909567699 2785.0  
17.935828264 2808.0  
17.962088829 2775.0  
17.988349394 2762.0  
18.014609959 2855.0  
18.040870524 2759.0  
18.067131089 2783.0  
18.093391654 2878.0  
18.119652219 2816.0  
18.145912784 2832.0  
18.172173349 2700.0  
18.198433914 2672.0  
18.224694479 2825.0  
18.250955044 2697.0  
18.277215609 2815.0  
18.303476174 2736.0  
18.329736739 2751.0  
18.355997304 2777.0  
18.382257869 2861.0  
18.408518434 2697.0  
18.434778999 2723.0  
18.461039564 2673.0  
18.487300129 2649.0  
18.513560695 2646.0  
18.539821260 2685.0  
18.566081825 2727.0  
18.592342390 2663.0  
18.618602955 2678.0  
18.644863520 2651.0  
18.671124085 2731.0  
18.697384650 2704.0

18.723645215 2681.0  
18.749905780 2652.0  
18.776166345 2667.0  
18.802426910 2691.0  
18.828687475 2597.0  
18.854948040 2672.0  
18.881208605 2602.0  
18.907469170 2619.0  
18.933729735 2632.0  
18.959990300 2679.0  
18.986250865 2591.0  
19.012511430 2658.0  
19.038771995 2657.0  
19.065032560 2592.0  
19.091293125 2577.0  
19.117553690 2723.0  
19.143814255 2628.0  
19.170074820 2741.0  
19.196335385 2691.0  
19.222595950 2595.0  
19.248856515 2635.0  
19.275117080 2689.0  
19.301377645 2607.0  
19.327638210 2537.0  
19.353898775 2613.0  
19.380159340 2618.0  
19.406419905 2635.0  
19.432680470 2523.0  
19.458941035 2530.0  
19.485201600 2655.0  
19.511462165 2539.0  
19.537722730 2629.0  
19.563983295 2606.0  
19.590243860 2566.0  
19.616504425 2532.0  
19.642764990 2524.0  
19.669025555 2564.0  
19.695286120 2583.0  
19.721546685 2476.0  
19.747807250 2542.0  
19.774067815 2535.0  
19.800328380 2485.0  
19.826588945 2482.0  
19.852849510 2506.0  
19.879110075 2560.0  
19.905370640 2548.0  
19.931631205 2502.0  
19.957891770 2462.0  
19.984152335 2423.0  
20.010412900 2519.0  
20.036673465 2419.0  
20.062934030 2518.0  
20.089194595 2424.0  
20.115455160 2433.0  
20.141715725 2493.0  
20.167976290 2451.0  
20.194236855 2502.0  
20.220497420 2570.0

20.246757985 2448.0  
20.273018550 2507.0  
20.299279115 2497.0  
20.325539680 2596.0  
20.351800245 2411.0  
20.378060810 2439.0  
20.404321375 2535.0  
20.430581940 2385.0  
20.456842505 2410.0  
20.483103070 2477.0  
20.509363635 2490.0  
20.535624200 2412.0  
20.561884765 2429.0  
20.588145330 2449.0  
20.614405895 2464.0  
20.640666460 2365.0  
20.666927025 2479.0  
20.693187590 2463.0  
20.719448155 2418.0  
20.745708720 2491.0  
20.771969285 2419.0  
20.798229850 2406.0  
20.824490415 2372.0  
20.850750980 2333.0  
20.877011545 2442.0  
20.903272110 2328.0  
20.929532675 2490.0  
20.955793240 2433.0  
20.982053805 2311.0  
21.008314370 2356.0  
21.034574935 2303.0  
21.060835500 2329.0  
21.087096065 2381.0  
21.113356630 2493.0  
21.139617195 2328.0  
21.165877760 2398.0  
21.192138325 2367.0  
21.218398890 2356.0  
21.244659455 2334.0  
21.270920020 2330.0  
21.297180585 2426.0  
21.323441150 2361.0  
21.349701715 2306.0  
21.375962280 2345.0  
21.402222845 2447.0  
21.428483410 2424.0  
21.454743975 2400.0  
21.481004540 2283.0  
21.507265105 2318.0  
21.533525671 2386.0  
21.559786236 2390.0  
21.586046801 2396.0  
21.612307366 2313.0  
21.638567931 2369.0  
21.664828496 2294.0  
21.691089061 2266.0  
21.717349626 2369.0  
21.743610191 2328.0

21.769870756 2401.0  
21.796131321 2324.0  
21.822391886 2302.0  
21.848652451 2472.0  
21.874913016 2289.0  
21.901173581 2370.0  
21.927434146 2272.0  
21.953694711 2339.0  
21.979955276 2294.0  
22.006215841 2285.0  
22.032476406 2243.0  
22.058736971 2420.0  
22.084997536 2353.0  
22.111258101 2323.0  
22.137518666 2328.0  
22.163779231 2250.0  
22.190039796 2236.0  
22.216300361 2226.0  
22.242560926 2260.0  
22.268821491 2375.0  
22.295082056 2186.0  
22.321342621 2189.0  
22.347603186 2268.0  
22.373863751 2318.0  
22.400124316 2299.0  
22.426384881 2397.0  
22.452645446 2278.0  
22.478906011 2322.0  
22.505166576 2311.0  
22.531427141 2240.0  
22.557687706 2311.0  
22.583948271 2312.0  
22.610208836 2331.0  
22.636469401 2219.0  
22.662729966 2212.0  
22.688990531 2312.0  
22.715251096 2167.0  
22.741511661 2314.0  
22.767772226 2268.0  
22.794032791 2254.0  
22.820293356 2265.0  
22.846553921 2297.0  
22.872814486 2276.0  
22.899075051 2220.0  
22.925335616 2096.0  
22.951596181 2180.0  
22.977856746 2276.0  
23.004117311 2211.0  
23.030377876 2222.0  
23.056638441 2215.0  
23.082899006 2175.0  
23.109159571 2310.0  
23.135420136 2241.0  
23.161680701 2206.0  
23.187941266 2276.0  
23.214201831 2202.0  
23.240462396 2189.0  
23.266722961 2305.0

23.292983526 2238.0  
23.319244091 2265.0  
23.345504656 2196.0  
23.371765221 2152.0  
23.398025786 2235.0  
23.424286351 2212.0  
23.450546916 2170.0  
23.476807481 2275.0  
23.503068046 2166.0  
23.529328611 2192.0  
23.555589176 2284.0  
23.581849741 2211.0  
23.608110306 2126.0  
23.634370871 2310.0  
23.660631436 2285.0  
23.686892001 2346.0  
23.713152566 2269.0  
23.739413131 2282.0  
23.765673696 2197.0  
23.791934261 2117.0  
23.818194826 2262.0  
23.844455391 2200.0  
23.870715956 2255.0  
23.896976521 2241.0  
23.923237086 2185.0  
23.949497651 2323.0  
23.975758216 2210.0  
24.002018781 2240.0  
24.028279346 2134.0  
24.054539911 2197.0  
24.080800476 2227.0  
24.107061041 2238.0  
24.133321606 2299.0  
24.159582171 2245.0  
24.185842736 2136.0  
24.212103301 2130.0  
24.238363866 2230.0  
24.264624431 2200.0  
24.290884996 2228.0  
24.317145561 2324.0  
24.343406126 2177.0  
24.369666691 2230.0  
24.395927256 2286.0  
24.422187821 2248.0  
24.448448386 2182.0  
24.474708951 2258.0  
24.500969516 2270.0  
24.527230082 2258.0  
24.553490647 2222.0  
24.579751212 2266.0  
24.606011777 2164.0  
24.632272342 2192.0  
24.658532907 2212.0  
24.684793472 2170.0  
24.711054037 2249.0  
24.737314602 2178.0  
24.763575167 2255.0  
24.789835732 2125.0

24.816096297 2178.0  
24.842356862 2242.0  
24.868617427 2298.0  
24.894877992 2147.0  
24.921138557 2184.0  
24.947399122 2199.0  
24.973659687 2266.0  
24.999920252 2226.0  
25.026180817 2232.0  
25.052441382 2240.0  
25.078701947 2142.0  
25.104962512 2211.0  
25.131223077 2177.0  
25.157483642 2166.0  
25.183744207 2212.0  
25.210004772 2166.0  
25.236265337 2171.0  
25.262525902 2298.0  
25.288786467 2260.0  
25.315047032 2147.0  
25.341307597 2255.0  
25.367568162 2237.0  
25.393828727 2320.0  
25.420089292 2293.0  
25.446349857 2259.0  
25.472610422 2319.0  
25.498870987 2190.0  
25.525131552 2267.0  
25.551392117 2227.0  
25.577652682 2339.0  
25.603913247 2287.0  
25.630173812 2316.0  
25.656434377 2283.0  
25.682694942 2318.0  
25.708955507 2260.0  
25.735216072 2183.0  
25.761476637 2329.0  
25.787737202 2301.0  
25.813997767 2372.0  
25.840258332 2304.0  
25.866518897 2402.0  
25.892779462 2383.0  
25.919040027 2300.0  
25.945300592 2436.0  
25.971561157 2284.0  
25.997821722 2273.0  
26.024082287 2349.0  
26.050342852 2264.0  
26.076603417 2411.0  
26.102863982 2400.0  
26.129124547 2376.0  
26.155385112 2474.0  
26.181645677 2502.0  
26.207906242 2506.0  
26.234166807 2444.0  
26.260427372 2475.0  
26.286687937 2447.0  
26.312948502 2477.0

26.339209067 2438.0  
26.365469632 2527.0  
26.391730197 2496.0  
26.417990762 2543.0  
26.444251327 2492.0  
26.470511892 2631.0  
26.496772457 2701.0  
26.523033022 2688.0  
26.549293587 2631.0  
26.575554152 2673.0  
26.601814717 2636.0  
26.628075282 2727.0  
26.654335847 2687.0  
26.680596412 2783.0  
26.706856977 2683.0  
26.733117542 2826.0  
26.759378107 2738.0  
26.785638672 2811.0  
26.811899237 2826.0  
26.838159802 2746.0  
26.864420367 2866.0  
26.890680932 2982.0  
26.916941497 2953.0  
26.943202062 3023.0  
26.969462627 2930.0  
26.995723192 2929.0  
27.021983757 3093.0  
27.048244322 3038.0  
27.074504887 2962.0  
27.100765452 3067.0  
27.127026017 3081.0  
27.153286582 3167.0  
27.179547147 3207.0  
27.205807712 3156.0  
27.232068277 3146.0  
27.258328842 3149.0  
27.284589407 3174.0  
27.310849972 3321.0  
27.337110537 3200.0  
27.363371102 3158.0  
27.389631667 3268.0  
27.415892232 3258.0  
27.442152797 3215.0  
27.468413362 3316.0  
27.494673927 3384.0  
27.520934493 3359.0  
27.547195058 3363.0  
27.573455623 3401.0  
27.599716188 3400.0  
27.625976753 3338.0  
27.652237318 3357.0  
27.678497883 3292.0  
27.704758448 3411.0  
27.731019013 3428.0  
27.757279578 3424.0  
27.783540143 3389.0  
27.809800708 3431.0  
27.836061273 3426.0

27.862321838 3381.0  
27.888582403 3323.0  
27.914842968 3309.0  
27.941103533 3349.0  
27.967364098 3410.0  
27.993624663 3318.0  
28.019885228 3323.0  
28.046145793 3309.0  
28.072406358 3376.0  
28.098666923 3234.0  
28.124927488 3271.0  
28.151188053 3346.0  
28.177448618 3316.0  
28.203709183 3286.0  
28.229969748 3255.0  
28.256230313 3105.0  
28.282490878 3284.0  
28.308751443 3095.0  
28.335012008 3026.0  
28.361272573 3091.0  
28.387533138 3159.0  
28.413793703 3079.0  
28.440054268 3102.0  
28.466314833 3027.0  
28.492575398 2926.0  
28.518835963 2954.0  
28.545096528 3008.0  
28.571357093 2889.0  
28.597617658 2901.0  
28.623878223 2879.0  
28.650138788 2834.0  
28.676399353 2909.0  
28.702659918 2953.0  
28.728920483 2650.0  
28.755181048 2748.0  
28.781441613 2831.0  
28.807702178 2737.0  
28.833962743 2706.0  
28.860223308 2719.0  
28.886483873 2696.0  
28.912744438 2639.0  
28.939005003 2646.0  
28.965265568 2534.0  
28.991526133 2599.0  
29.017786698 2586.0  
29.044047263 2542.0  
29.070307828 2520.0  
29.096568393 2512.0  
29.122828958 2503.0  
29.149089523 2395.0  
29.175350088 2414.0  
29.201610653 2542.0  
29.227871218 2407.0  
29.254131783 2458.0  
29.280392348 2349.0  
29.306652913 2331.0  
29.332913478 2332.0  
29.359174043 2255.0



29.385434608 2278.0  
29.411695173 2260.0  
29.437955738 2204.0  
29.464216303 2160.0  
29.490476868 2122.0  
29.516737433 2247.0  
29.542997998 2140.0  
29.569258563 2186.0  
29.595519128 2207.0  
29.621779693 2299.0  
29.648040258 2213.0  
29.674300823 2110.0  
29.700561388 2095.0  
29.726821953 2033.0  
29.753082518 2134.0  
29.779343083 2125.0  
29.805603648 2093.0  
29.831864213 2102.0  
29.858124778 1946.0  
29.884385343 2087.0  
29.910645908 2005.0  
29.936906473 2127.0  
29.963167038 2101.0  
29.989427603 1974.0  
30.015688168 2003.0  
30.041948733 2033.0  
30.068209298 1948.0  
30.094469863 1983.0  
30.120730428 1942.0  
30.146990993 1908.0  
30.173251558 1914.0  
30.199512123 1930.0  
30.225772688 1897.0  
30.252033253 1914.0  
30.278293818 1882.0  
30.304554383 1846.0  
30.330814948 1787.0  
30.357075513 1847.0  
30.383336078 1793.0  
30.409596643 1898.0  
30.435857208 1792.0  
30.462117773 1865.0  
30.488378338 1809.0  
30.514638904 1879.0  
30.540899469 1927.0  
30.567160034 1855.0  
30.593420599 1820.0  
30.619681164 1869.0  
30.645941729 1860.0  
30.672202294 1748.0  
30.698462859 1805.0  
30.724723424 1875.0  
30.750983989 1742.0  
30.777244554 1757.0  
30.803505119 1725.0  
30.829765684 1797.0  
30.856026249 1769.0  
30.882286814 1767.0

30.908547379 1823.0  
30.934807944 1727.0  
30.961068509 1705.0  
30.987329074 1717.0  
31.013589639 1722.0  
31.039850204 1721.0  
31.066110769 1746.0  
31.092371334 1681.0  
31.118631899 1690.0  
31.144892464 1754.0  
31.171153029 1700.0  
31.197413594 1763.0  
31.223674159 1702.0  
31.249934724 1782.0  
31.276195289 1708.0  
31.302455854 1746.0  
31.328716419 1768.0  
31.354976984 1670.0  
31.381237549 1690.0  
31.407498114 1706.0  
31.433758679 1711.0  
31.460019244 1737.0  
31.486279809 1725.0  
31.512540374 1767.0  
31.538800939 1729.0  
31.565061504 1743.0  
31.591322069 1655.0  
31.617582634 1704.0  
31.643843199 1729.0  
31.670103764 1721.0  
31.696364329 1743.0  
31.722624894 1689.0  
31.748885459 1656.0  
31.775146024 1711.0  
31.801406589 1673.0  
31.827667154 1661.0  
31.853927719 1582.0  
31.880188284 1679.0  
31.906448849 1717.0  
31.932709414 1696.0  
31.958969979 1679.0  
31.985230544 1637.0  
32.011491109 1613.0  
32.037751674 1606.0  
32.064012239 1647.0  
32.090272804 1597.0  
32.116533369 1651.0  
32.142793934 1694.0  
32.169054499 1609.0  
32.195315064 1608.0  
32.221575629 1540.0  
32.247836194 1616.0  
32.274096759 1590.0  
32.300357324 1570.0  
32.326617889 1638.0  
32.352878454 1623.0  
32.379139019 1616.0  
32.405399584 1626.0

32.431660149 1583.0  
32.457920714 1588.0  
32.484181279 1642.0  
32.510441844 1601.0  
32.536702409 1568.0  
32.562962974 1571.0  
32.589223539 1587.0  
32.615484104 1570.0  
32.641744669 1641.0  
32.668005234 1634.0  
32.694265799 1624.0  
32.720526364 1548.0  
32.746786929 1627.0  
32.773047494 1596.0  
32.799308059 1607.0  
32.825568624 1560.0  
32.851829189 1592.0  
32.878089754 1594.0  
32.904350319 1462.0  
32.930610884 1640.0  
32.956871449 1568.0  
32.983132014 1619.0  
33.009392579 1561.0  
33.035653144 1569.0  
33.061913709 1490.0  
33.088174274 1616.0  
33.114434839 1510.0  
33.140695404 1528.0  
33.166955969 1567.0  
33.193216534 1587.0  
33.219477099 1577.0  
33.245737664 1557.0  
33.271998229 1614.0  
33.298258794 1465.0  
33.324519359 1562.0  
33.350779924 1501.0  
33.377040489 1508.0  
33.403301054 1569.0  
33.429561619 1516.0  
33.455822184 1441.0  
33.482082749 1534.0  
33.508343315 1534.0  
33.534603880 1535.0  
33.560864445 1500.0  
33.587125010 1584.0  
33.613385575 1608.0  
33.639646140 1535.0  
33.665906705 1571.0  
33.692167270 1534.0  
33.718427835 1517.0  
33.744688400 1583.0  
33.770948965 1536.0  
33.797209530 1509.0  
33.823470095 1528.0  
33.849730660 1636.0  
33.875991225 1553.0  
33.902251790 1517.0  
33.928512355 1523.0

33.954772920 1515.0  
33.981033485 1535.0  
34.007294050 1494.0  
34.033554615 1501.0  
34.059815180 1589.0  
34.086075745 1590.0  
34.112336310 1594.0  
34.138596875 1567.0  
34.164857440 1553.0  
34.191118005 1586.0  
34.217378570 1560.0  
34.243639135 1456.0  
34.269899700 1536.0  
34.296160265 1604.0  
34.322420830 1568.0  
34.348681395 1539.0  
34.374941960 1461.0  
34.401202525 1489.0  
34.427463090 1537.0  
34.453723655 1495.0  
34.479984220 1537.0  
34.506244785 1520.0  
34.532505350 1541.0  
34.558765915 1473.0  
34.585026480 1533.0  
34.611287045 1550.0  
34.637547610 1517.0  
34.663808175 1557.0  
34.690068740 1560.0  
34.716329305 1577.0  
34.742589870 1547.0  
34.768850435 1525.0  
34.795111000 1531.0  
34.821371565 1516.0  
34.847632130 1480.0  
34.873892695 1547.0  
34.900153260 1526.0  
34.926413825 1497.0  
34.952674390 1502.0  
34.978934955 1566.0  
35.005195520 1531.0  
35.031456085 1562.0  
35.057716650 1544.0  
35.083977215 1575.0  
35.110237780 1478.0  
35.136498345 1518.0  
35.162758910 1578.0  
35.189019475 1601.0  
35.215280040 1577.0  
35.241540605 1553.0  
35.267801170 1544.0  
35.294061735 1478.0  
35.320322300 1573.0  
35.346582865 1570.0  
35.372843430 1597.0  
35.399103995 1607.0  
35.425364560 1585.0  
35.451625125 1603.0

35.477885690 1632.0  
35.504146255 1498.0  
35.530406820 1635.0  
35.556667385 1554.0  
35.582927950 1599.0  
35.609188515 1612.0  
35.635449080 1595.0  
35.661709645 1678.0  
35.687970210 1541.0  
35.714230775 1662.0  
35.740491340 1695.0  
35.766751905 1601.0  
35.793012470 1645.0  
35.819273035 1669.0  
35.845533600 1677.0  
35.871794165 1682.0  
35.898054730 1632.0  
35.924315295 1688.0  
35.950575860 1675.0  
35.976836425 1686.0  
36.003096990 1772.0  
36.029357555 1685.0  
36.055618120 1697.0  
36.081878685 1637.0  
36.108139250 1732.0  
36.134399815 1730.0  
36.160660380 1737.0  
36.186920945 1822.0  
36.213181510 1763.0  
36.239442075 1745.0  
36.265702640 1746.0  
36.291963205 1736.0  
36.318223770 1777.0  
36.344484335 1771.0  
36.370744900 1833.0  
36.397005465 1780.0  
36.423266030 1815.0  
36.449526595 1789.0  
36.475787160 1809.0  
36.502047725 1848.0  
36.528308291 1847.0  
36.554568856 1825.0  
36.580829421 1811.0  
36.607089986 1937.0  
36.633350551 1766.0  
36.659611116 1915.0  
36.685871681 2024.0  
36.712132246 1931.0  
36.738392811 1923.0  
36.764653376 1984.0  
36.790913941 1958.0  
36.817174506 1903.0  
36.843435071 2014.0  
36.869695636 1985.0  
36.895956201 2059.0  
36.922216766 2072.0  
36.948477331 2144.0  
36.974737896 2036.0

37.000998461 2121.0  
37.027259026 2034.0  
37.053519591 2065.0  
37.079780156 2124.0  
37.106040721 2042.0  
37.132301286 2088.0  
37.158561851 2144.0  
37.184822416 2126.0  
37.211082981 2189.0  
37.237343546 2175.0  
37.263604111 2159.0  
37.289864676 2129.0  
37.316125241 2241.0  
37.342385806 2196.0  
37.368646371 2138.0  
37.394906936 2248.0  
37.421167501 2270.0  
37.447428066 2340.0  
37.473688631 2256.0  
37.499949196 2274.0  
37.526209761 2370.0  
37.552470326 2316.0  
37.578730891 2431.0  
37.604991456 2323.0  
37.631252021 2391.0  
37.657512586 2406.0  
37.683773151 2360.0  
37.710033716 2373.0  
37.736294281 2354.0  
37.762554846 2370.0  
37.788815411 2373.0  
37.815075976 2427.0  
37.841336541 2437.0  
37.867597106 2366.0  
37.893857671 2484.0  
37.920118236 2537.0  
37.946378801 2411.0  
37.972639366 2427.0  
37.998899931 2453.0  
38.025160496 2365.0  
38.051421061 2397.0  
38.077681626 2394.0  
38.103942191 2420.0  
38.130202756 2331.0  
38.156463321 2437.0  
38.182723886 2430.0  
38.208984451 2385.0  
38.235245016 2549.0  
38.261505581 2426.0  
38.287766146 2483.0  
38.314026711 2457.0  
38.340287276 2440.0  
38.366547841 2409.0  
38.392808406 2377.0  
38.419068971 2456.0  
38.445329536 2432.0  
38.471590101 2414.0  
38.497850666 2393.0

38.524111231 2390.0  
38.550371796 2309.0  
38.576632361 2371.0  
38.602892926 2330.0  
38.629153491 2424.0  
38.655414056 2294.0  
38.681674621 2448.0  
38.707935186 2305.0  
38.734195751 2304.0  
38.760456316 2305.0  
38.786716881 2345.0  
38.812977446 2260.0  
38.839238011 2303.0  
38.865498576 2209.0  
38.891759141 2267.0  
38.918019706 2223.0  
38.944280271 2258.0  
38.970540836 2215.0  
38.996801401 2243.0  
39.023061966 2267.0  
39.049322531 2244.0  
39.075583096 2167.0  
39.101843661 2148.0  
39.128104226 2191.0  
39.154364791 2113.0  
39.180625356 2089.0  
39.206885921 2136.0  
39.233146486 2089.0  
39.259407051 1999.0  
39.285667616 2034.0  
39.311928181 2119.0  
39.338188746 2056.0  
39.364449311 2151.0  
39.390709876 1992.0  
39.416970441 2072.0  
39.443231006 2105.0  
39.469491571 2023.0  
39.495752136 1993.0  
39.522012702 1979.0  
39.548273267 1921.0  
39.574533832 1950.0  
39.600794397 1971.0  
39.627054962 2005.0  
39.653315527 1850.0  
39.679576092 2016.0  
39.705836657 1904.0  
39.732097222 1927.0  
39.758357787 1843.0  
39.784618352 1860.0  
39.810878917 1891.0  
39.837139482 1789.0  
39.863400047 1790.0  
39.889660612 1819.0  
39.915921177 1843.0  
39.942181742 1796.0  
39.968442307 1805.0  
39.994702872 1858.0  
40.020963437 1847.0

40.047224002 1866.0  
40.073484567 1777.0  
40.099745132 1691.0  
40.126005697 1752.0  
40.152266262 1819.0  
40.178526827 1746.0  
40.204787392 1806.0  
40.231047957 1763.0  
40.257308522 1734.0  
40.283569087 1718.0  
40.309829652 1708.0  
40.336090217 1741.0  
40.362350782 1798.0  
40.388611347 1637.0  
40.414871912 1648.0  
40.441132477 1710.0  
40.467393042 1625.0  
40.493653607 1730.0  
40.519914172 1649.0  
40.546174737 1591.0  
40.572435302 1620.0  
40.598695867 1658.0  
40.624956432 1622.0  
40.651216997 1628.0  
40.677477562 1581.0  
40.703738127 1664.0  
40.729998692 1559.0  
40.756259257 1587.0  
40.782519822 1526.0  
40.808780387 1558.0  
40.835040952 1541.0  
40.861301517 1510.0  
40.887562082 1563.0  
40.913822647 1626.0  
40.940083212 1514.0  
40.966343777 1578.0  
40.992604342 1572.0  
41.018864907 1544.0  
41.045125472 1558.0  
41.071386037 1507.0  
41.097646602 1521.0  
41.123907167 1479.0  
41.150167732 1527.0  
41.176428297 1581.0  
41.202688862 1521.0  
41.228949427 1457.0  
41.255209992 1484.0  
41.281470557 1452.0  
41.307731122 1491.0  
41.333991687 1455.0  
41.360252252 1465.0  
41.386512817 1464.0  
41.412773382 1447.0  
41.439033947 1514.0  
41.465294512 1528.0  
41.491555077 1515.0  
41.517815642 1531.0  
41.544076207 1516.0



41.570336772 1498.0  
41.596597337 1512.0  
41.622857902 1463.0  
41.649118467 1464.0  
41.675379032 1475.0  
41.701639597 1472.0  
41.727900162 1459.0  
41.754160727 1414.0  
41.780421292 1433.0  
41.806681857 1430.0  
41.832942422 1434.0  
41.859202987 1466.0  
41.885463552 1391.0  
41.911724117 1389.0  
41.937984682 1502.0  
41.964245247 1407.0  
41.990505812 1506.0  
42.016766377 1412.0  
42.043026942 1413.0  
42.069287507 1368.0  
42.095548072 1457.0  
42.121808637 1427.0  
42.148069202 1398.0  
42.174329767 1434.0  
42.200590332 1466.0  
42.226850897 1356.0  
42.253111462 1413.0  
42.279372027 1397.0  
42.305632592 1427.0  
42.331893157 1375.0  
42.358153722 1398.0  
42.384414287 1370.0  
42.410674852 1405.0  
42.436935417 1427.0  
42.463195982 1391.0  
42.489456547 1414.0  
42.515717113 1365.0  
42.541977678 1414.0  
42.568238243 1417.0  
42.594498808 1460.0  
42.620759373 1385.0  
42.647019938 1458.0  
42.673280503 1362.0  
42.699541068 1359.0  
42.725801633 1351.0  
42.752062198 1425.0  
42.778322763 1389.0  
42.804583328 1358.0  
42.830843893 1422.0  
42.857104458 1420.0  
42.883365023 1320.0  
42.909625588 1366.0  
42.935886153 1429.0  
42.962146718 1377.0  
42.988407283 1423.0  
43.014667848 1413.0  
43.040928413 1357.0  
43.067188978 1348.0

43.093449543 1438.0  
43.119710108 1350.0  
43.145970673 1350.0  
43.172231238 1383.0  
43.198491803 1453.0  
43.224752368 1347.0  
43.251012933 1321.0  
43.277273498 1303.0  
43.303534063 1324.0  
43.329794628 1379.0  
43.356055193 1311.0  
43.382315758 1348.0  
43.408576323 1311.0  
43.434836888 1460.0  
43.461097453 1388.0  
43.487358018 1389.0  
43.513618583 1325.0  
43.539879148 1422.0  
43.566139713 1339.0  
43.592400278 1363.0  
43.618660843 1332.0  
43.644921408 1391.0  
43.671181973 1363.0  
43.697442538 1376.0  
43.723703103 1352.0  
43.749963668 1404.0  
43.776224233 1356.0  
43.802484798 1443.0  
43.828745363 1339.0  
43.855005928 1324.0  
43.881266493 1416.0  
43.907527058 1356.0  
43.933787623 1436.0  
43.960048188 1373.0  
43.986308753 1466.0  
44.012569318 1375.0  
44.038829883 1360.0  
44.065090448 1395.0  
44.091351013 1399.0  
44.117611578 1466.0  
44.143872143 1375.0  
44.170132708 1410.0  
44.196393273 1441.0  
44.222653838 1453.0  
44.248914403 1412.0  
44.275174968 1434.0  
44.301435533 1384.0  
44.327696098 1474.0  
44.353956663 1404.0  
44.380217228 1423.0  
44.406477793 1423.0  
44.432738358 1428.0  
44.458998923 1446.0  
44.485259488 1429.0  
44.511520053 1392.0  
44.537780618 1426.0  
44.564041183 1368.0  
44.590301748 1391.0

44.616562313 1499.0  
44.642822878 1487.0  
44.669083443 1416.0  
44.695344008 1432.0  
44.721604573 1499.0  
44.747865138 1482.0  
44.774125703 1423.0  
44.800386268 1461.0  
44.826646833 1491.0  
44.852907398 1526.0  
44.879167963 1501.0  
44.905428528 1373.0  
44.931689093 1491.0  
44.957949658 1540.0  
44.984210223 1511.0  
45.010470788 1480.0  
45.036731353 1447.0  
45.062991918 1408.0  
45.089252483 1469.0  
45.115513048 1472.0  
45.141773613 1398.0  
45.168034178 1398.0  
45.194294743 1496.0  
45.220555308 1437.0  
45.246815873 1446.0  
45.273076438 1509.0  
45.299337003 1446.0  
45.325597568 1462.0  
45.351858133 1392.0  
45.378118698 1538.0  
45.404379263 1467.0  
45.430639828 1455.0  
45.456900393 1500.0  
45.483160958 1474.0  
45.509421524 1486.0  
45.535682089 1446.0  
45.561942654 1502.0  
45.588203219 1534.0  
45.614463784 1516.0  
45.640724349 1497.0  
45.666984914 1456.0  
45.693245479 1400.0  
45.719506044 1416.0  
45.745766609 1478.0  
45.772027174 1562.0  
45.798287739 1573.0  
45.824548304 1526.0  
45.850808869 1482.0  
45.877069434 1459.0  
45.903329999 1452.0  
45.929590564 1522.0  
45.955851129 1494.0  
45.982111694 1443.0  
46.008372259 1486.0  
46.034632824 1550.0  
46.060893389 1495.0  
46.087153954 1546.0  
46.113414519 1473.0

46.139675084 1520.0  
46.165935649 1570.0  
46.192196214 1570.0  
46.218456779 1568.0  
46.244717344 1495.0  
46.270977909 1522.0  
46.297238474 1543.0  
46.323499039 1585.0  
46.349759604 1462.0  
46.376020169 1525.0  
46.402280734 1603.0  
46.428541299 1574.0  
46.454801864 1572.0  
46.481062429 1499.0  
46.507322994 1404.0  
46.533583559 1487.0  
46.559844124 1533.0  
46.586104689 1513.0  
46.612365254 1519.0  
46.638625819 1543.0  
46.664886384 1547.0  
46.691146949 1572.0  
46.717407514 1567.0  
46.743668079 1605.0  
46.769928644 1591.0  
46.796189209 1564.0  
46.822449774 1608.0  
46.848710339 1624.0  
46.874970904 1581.0  
46.901231469 1608.0  
46.927492034 1634.0  
46.953752599 1602.0  
46.980013164 1668.0  
47.006273729 1603.0  
47.032534294 1588.0  
47.058794859 1580.0  
47.085055424 1639.0  
47.111315989 1704.0  
47.137576554 1598.0  
47.163837119 1607.0  
47.190097684 1676.0  
47.216358249 1646.0  
47.242618814 1688.0  
47.268879379 1694.0  
47.295139944 1655.0  
47.321400509 1665.0  
47.347661074 1673.0  
47.373921639 1664.0  
47.400182204 1695.0  
47.426442769 1732.0  
47.452703334 1634.0  
47.478963899 1614.0  
47.505224464 1695.0  
47.531485029 1652.0  
47.557745594 1678.0  
47.584006159 1687.0  
47.610266724 1736.0  
47.636527289 1766.0

47.662787854 1755.0  
47.689048419 1776.0  
47.715308984 1756.0  
47.741569549 1751.0  
47.767830114 1713.0  
47.794090679 1671.0  
47.820351244 1770.0  
47.846611809 1759.0  
47.872872374 1831.0  
47.899132939 1783.0  
47.925393504 1823.0  
47.951654069 1781.0  
47.977914634 1771.0  
48.004175199 1797.0  
48.030435764 1743.0  
48.056696329 1755.0  
48.082956894 1827.0  
48.109217459 1876.0  
48.135478024 1808.0  
48.161738589 1856.0  
48.187999154 1896.0  
48.214259719 1849.0  
48.240520284 1888.0  
48.266780849 1922.0  
48.293041414 1923.0  
48.319301979 2025.0  
48.345562544 1952.0  
48.371823109 2064.0  
48.398083674 1958.0  
48.424344239 1967.0  
48.450604804 1941.0  
48.476865369 2031.0  
48.503125935 2076.0  
48.529386500 2054.0  
48.555647065 2107.0  
48.581907630 2150.0  
48.608168195 2186.0  
48.634428760 2130.0  
48.660689325 2171.0  
48.686949890 2278.0  
48.713210455 2276.0  
48.739471020 2319.0  
48.765731585 2224.0  
48.791992150 2320.0  
48.818252715 2443.0  
48.844513280 2480.0  
48.870773845 2316.0  
48.897034410 2446.0  
48.923294975 2532.0  
48.949555540 2540.0  
48.975816105 2612.0  
49.002076670 2587.0  
49.028337235 2597.0  
49.054597800 2646.0  
49.080858365 2719.0  
49.107118930 2709.0  
49.133379495 2607.0  
49.159640060 2710.0

49.185900625 2599.0  
49.212161190 2627.0  
49.238421755 2480.0  
49.264682320 2574.0  
49.290942885 2439.0  
49.317203450 2355.0  
49.343464015 2382.0  
49.369724580 2393.0  
49.395985145 2368.0  
49.422245710 2287.0  
49.448506275 2290.0  
49.474766840 2313.0  
49.501027405 2282.0  
49.527287970 2173.0  
49.553548535 2113.0  
49.579809100 2098.0  
49.606069665 2028.0  
49.632330230 1955.0  
49.658590795 2017.0  
49.684851360 1945.0  
49.711111925 1929.0  
49.737372490 1845.0  
49.763633055 1788.0  
49.789893620 1789.0  
49.816154185 1758.0  
49.842414750 1783.0  
49.868675315 1831.0  
49.894935880 1796.0  
49.921196445 1622.0  
49.947457010 1709.0  
49.973717575 1745.0  
49.999978140 1684.0  
50.026238705 1652.0  
50.052499270 1605.0  
50.078759835 1687.0  
50.105020400 1525.0  
50.131280965 1564.0  
50.157541530 1494.0  
50.183802095 1631.0  
50.210062660 1570.0  
50.236323225 1518.0  
50.262583790 1561.0  
50.288844355 1479.0  
50.315104920 1511.0  
50.341365485 1467.0  
50.367626050 1457.0  
50.393886615 1418.0  
50.420147180 1469.0  
50.446407745 1424.0  
50.472668310 1459.0  
50.498928875 1437.0  
50.525189440 1450.0  
50.551450005 1415.0  
50.577710570 1426.0  
50.603971135 1458.0  
50.630231700 1388.0  
50.656492265 1356.0  
50.682752830 1385.0

50.709013395 1413.0  
50.735273960 1401.0  
50.761534525 1390.0  
50.787795090 1405.0  
50.814055655 1417.0  
50.840316220 1395.0  
50.866576785 1367.0  
50.892837350 1365.0  
50.919097915 1330.0  
50.945358480 1301.0  
50.971619045 1326.0  
50.997879610 1348.0  
51.024140175 1310.0  
51.050400740 1303.0  
51.076661305 1363.0  
51.102921870 1307.0  
51.129182435 1255.0  
51.155443000 1315.0  
51.181703565 1263.0  
51.207964130 1320.0  
51.234224695 1295.0  
51.260485260 1285.0  
51.286745825 1254.0  
51.313006390 1335.0  
51.339266955 1226.0  
51.365527520 1283.0  
51.391788085 1265.0  
51.418048650 1262.0  
51.444309215 1287.0  
51.470569780 1225.0  
51.496830345 1251.0  
51.523090911 1189.0  
51.549351476 1200.0  
51.575612041 1228.0  
51.601872606 1179.0  
51.628133171 1215.0  
51.654393736 1196.0  
51.680654301 1228.0  
51.706914866 1237.0  
51.733175431 1200.0  
51.759435996 1103.0  
51.785696561 1136.0  
51.811957126 1121.0  
51.838217691 1103.0  
51.864478256 1108.0  
51.890738821 1172.0  
51.916999386 1131.0  
51.943259951 1128.0  
51.969520516 1127.0  
51.995781081 1120.0  
52.022041646 1076.0  
52.048302211 1097.0  
52.074562776 1093.0  
52.100823341 1068.0  
52.127083906 1115.0  
52.153344471 1113.0  
52.179605036 1052.0  
52.205865601 1127.0

52.232126166 1065.0  
52.258386731 1099.0  
52.284647296 1054.0  
52.310907861 1002.0  
52.337168426 1044.0  
52.363428991 1054.0  
52.389689556 1026.0  
52.415950121 1022.0  
52.442210686 1035.0  
52.468471251 1001.0  
52.494731816 1085.0  
52.520992381 1004.0  
52.547252946 1073.0  
52.573513511 1054.0  
52.599774076 1027.0  
52.626034641 1059.0  
52.652295206 1106.0  
52.678555771 1075.0  
52.704816336 1060.0  
52.731076901 1027.0  
52.757337466 1013.0  
52.783598031 932.0  
52.809858596 1006.0  
52.836119161 977.0  
52.862379726 958.0  
52.888640291 1008.0  
52.914900856 1023.0  
52.941161421 1005.0  
52.967421986 984.0  
52.993682551 959.0  
53.019943116 979.0  
53.046203681 968.0  
53.072464246 1124.0  
53.098724811 1075.0  
53.124985376 1033.0  
53.151245941 1012.0  
53.177506506 997.0  
53.203767071 988.0  
53.230027636 1031.0  
53.256288201 1036.0  
53.282548766 988.0  
53.308809331 1027.0  
53.335069896 977.0  
53.361330461 1032.0  
53.387591026 954.0  
53.413851591 1041.0  
53.440112156 1011.0  
53.466372721 1049.0  
53.492633286 940.0  
53.518893851 1009.0  
53.545154416 989.0  
53.571414981 1029.0  
53.597675546 1043.0  
53.623936111 1063.0  
53.650196676 1062.0  
53.676457241 1028.0  
53.702717806 1069.0  
53.728978371 1065.0



53.755238936 1023.0  
53.781499501 937.0  
53.807760066 984.0  
53.834020631 997.0  
53.860281196 1081.0  
53.886541761 994.0  
53.912802326 1016.0  
53.939062891 1003.0  
53.965323456 996.0  
53.991584021 996.0  
54.017844586 1013.0  
54.044105151 1109.0  
54.070365716 966.0  
54.096626281 1006.0  
54.122886846 1094.0  
54.149147411 992.0  
54.175407976 1048.0  
54.201668541 941.0  
54.227929106 1021.0  
54.254189671 997.0  
54.280450236 1027.0  
54.306710801 1010.0  
54.332971366 993.0  
54.359231931 1030.0  
54.385492496 1073.0  
54.411753061 1069.0  
54.438013626 1039.0  
54.464274191 1014.0  
54.490534756 1030.0  
54.516795322 1107.0  
54.543055887 1108.0  
54.569316452 1041.0  
54.595577017 1001.0  
54.621837582 1068.0  
54.648098147 1041.0  
54.674358712 973.0  
54.700619277 1021.0  
54.726879842 1035.0  
54.753140407 1054.0  
54.779400972 1094.0  
54.805661537 1051.0  
54.831922102 1010.0  
54.858182667 980.0  
54.884443232 994.0  
54.910703797 1028.0  
54.936964362 974.0  
54.963224927 1032.0  
54.989485492 1113.0  
55.015746057 1007.0  
55.042006622 1081.0  
55.068267187 1053.0  
55.094527752 1024.0  
55.120788317 993.0  
55.147048882 979.0  
55.173309447 1024.0  
55.199570012 1007.0  
55.225830577 1051.0  
55.252091142 1050.0

55.278351707 994.0  
55.304612272 1069.0  
55.330872837 1023.0  
55.357133402 1077.0  
55.383393967 1051.0  
55.409654532 1058.0  
55.435915097 1008.0  
55.462175662 1026.0  
55.488436227 988.0  
55.514696792 1011.0  
55.540957357 1095.0  
55.567217922 1015.0  
55.593478487 1007.0  
55.619739052 983.0  
55.645999617 1025.0  
55.672260182 1009.0  
55.698520747 998.0  
55.724781312 980.0  
55.751041877 1023.0  
55.777302442 947.0  
55.803563007 994.0  
55.829823572 954.0  
55.856084137 1029.0  
55.882344702 1034.0  
55.908605267 1001.0  
55.934865832 942.0  
55.961126397 983.0  
55.987386962 933.0  
56.013647527 906.0  
56.039908092 998.0  
56.066168657 1022.0  
56.092429222 982.0  
56.118689787 1010.0  
56.144950352 956.0  
56.171210917 988.0  
56.197471482 984.0  
56.223732047 967.0  
56.249992612 934.0  
56.276253177 1045.0  
56.302513742 1023.0  
56.328774307 950.0  
56.355034872 1001.0  
56.381295437 943.0  
56.407556002 961.0  
56.433816567 932.0  
56.460077132 919.0  
56.486337697 878.0  
56.512598262 1037.0  
56.538858827 934.0  
56.565119392 964.0  
56.591379957 964.0  
56.617640522 938.0  
56.643901087 957.0  
56.670161652 933.0  
56.696422217 862.0  
56.722682782 919.0  
56.748943347 962.0  
56.775203912 928.0

56.801464477 1005.0  
56.827725042 958.0  
56.853985607 950.0  
56.880246172 918.0  
56.906506737 955.0  
56.932767302 845.0  
56.959027867 971.0  
56.985288432 916.0  
57.011548997 867.0  
57.037809562 946.0  
57.064070127 923.0  
57.090330692 891.0  
57.116591257 938.0  
57.142851822 919.0  
57.169112387 871.0  
57.195372952 929.0  
57.221633517 907.0  
57.247894082 925.0  
57.274154647 953.0  
57.300415212 922.0  
57.326675777 852.0  
57.352936342 923.0  
57.379196907 946.0  
57.405457472 896.0  
57.431718037 913.0  
57.457978602 841.0  
57.484239167 835.0  
57.510499733 904.0  
57.536760298 836.0  
57.563020863 874.0  
57.589281428 920.0  
57.615541993 871.0  
57.641802558 889.0  
57.668063123 860.0  
57.694323688 822.0  
57.720584253 851.0  
57.746844818 870.0  
57.773105383 902.0  
57.799365948 898.0  
57.825626513 867.0  
57.851887078 922.0  
57.878147643 881.0  
57.904408208 875.0  
57.930668773 916.0  
57.956929338 838.0  
57.983189903 913.0  
58.009450468 881.0  
58.035711033 831.0  
58.061971598 903.0  
58.088232163 958.0  
58.114492728 883.0  
58.140753293 905.0  
58.167013858 807.0  
58.193274423 859.0  
58.219534988 853.0  
58.245795553 836.0  
58.272056118 830.0  
58.298316683 871.0

58.324577248 880.0  
58.350837813 888.0  
58.377098378 857.0  
58.403358943 842.0  
58.429619508 878.0  
58.455880073 875.0  
58.482140638 850.0  
58.508401203 843.0  
58.534661768 844.0  
58.560922333 859.0  
58.587182898 838.0  
58.613443463 889.0  
58.639704028 845.0  
58.665964593 844.0  
58.692225158 878.0  
58.718485723 852.0  
58.744746288 892.0  
58.771006853 816.0  
58.797267418 850.0  
58.823527983 908.0  
58.849788548 830.0  
58.876049113 820.0  
58.902309678 808.0  
58.928570243 891.0  
58.954830808 857.0  
58.981091373 857.0  
59.007351938 811.0  
59.033612503 872.0  
59.059873068 875.0  
59.086133633 844.0  
59.112394198 868.0  
59.138654763 836.0  
59.164915328 827.0  
59.191175893 867.0  
59.217436458 847.0  
59.243697023 818.0  
59.269957588 846.0  
59.296218153 865.0  
59.322478718 824.0  
59.348739283 805.0  
59.374999848 888.0  
59.401260413 801.0  
59.427520978 870.0  
59.453781543 861.0  
59.480042108 869.0  
59.506302673 793.0  
59.532563238 852.0  
59.558823803 794.0  
59.585084368 852.0  
59.611344933 869.0  
59.637605498 845.0  
59.663866063 865.0  
59.690126628 833.0  
59.716387193 861.0  
59.742647758 839.0  
59.768908323 835.0  
59.795168888 849.0  
59.821429453 901.0

59.847690018 844.0  
59.873950583 853.0  
59.900211148 851.0  
59.926471713 844.0  
59.952732278 830.0  
59.978992843 796.0  
60.005253408 875.0  
60.031513973 882.0  
60.057774538 834.0  
60.084035103 832.0  
60.110295668 845.0  
60.136556233 807.0  
60.162816798 860.0  
60.189077363 876.0  
60.215337928 827.0  
60.241598493 820.0  
60.267859058 834.0  
60.294119623 885.0  
60.320380188 883.0  
60.346640753 824.0  
60.372901318 833.0  
60.399161883 832.0  
60.425422448 842.0  
60.451683013 870.0  
60.477943578 840.0  
60.504204144 838.0  
60.530464709 813.0  
60.556725274 834.0  
60.582985839 823.0  
60.609246404 853.0  
60.635506969 849.0  
60.661767534 883.0  
60.688028099 828.0  
60.714288664 894.0  
60.740549229 825.0  
60.766809794 826.0  
60.793070359 863.0  
60.819330924 793.0  
60.845591489 860.0  
60.871852054 813.0  
60.898112619 880.0  
60.924373184 849.0  
60.950633749 875.0  
60.976894314 846.0  
61.003154879 821.0  
61.029415444 817.0  
61.055676009 837.0  
61.081936574 842.0  
61.108197139 826.0  
61.134457704 843.0  
61.160718269 810.0  
61.186978834 811.0  
61.213239399 858.0  
61.239499964 859.0  
61.265760529 857.0  
61.292021094 845.0  
61.318281659 836.0  
61.344542224 820.0

61.370802789 834.0  
61.397063354 918.0  
61.423323919 787.0  
61.449584484 829.0  
61.475845049 821.0  
61.502105614 825.0  
61.528366179 814.0  
61.554626744 869.0  
61.580887309 861.0  
61.607147874 853.0  
61.633408439 846.0  
61.659669004 853.0  
61.685929569 844.0  
61.712190134 817.0  
61.738450699 876.0  
61.764711264 873.0  
61.790971829 885.0  
61.817232394 794.0  
61.843492959 856.0  
61.869753524 880.0  
61.896014089 862.0  
61.922274654 875.0  
61.948535219 830.0  
61.974795784 848.0  
62.001056349 876.0  
62.027316914 906.0  
62.053577479 908.0  
62.079838044 821.0  
62.106098609 878.0  
62.132359174 885.0  
62.158619739 879.0  
62.184880304 907.0  
62.211140869 891.0  
62.237401434 886.0  
62.263661999 918.0  
62.289922564 887.0  
62.316183129 877.0  
62.342443694 956.0  
62.368704259 882.0  
62.394964824 962.0  
62.421225389 873.0  
62.447485954 898.0  
62.473746519 925.0  
62.500007084 899.0  
62.526267649 921.0  
62.552528214 916.0  
62.578788779 924.0  
62.605049344 958.0  
62.631309909 947.0  
62.657570474 959.0  
62.683831039 967.0  
62.710091604 911.0  
62.736352169 901.0  
62.762612734 918.0  
62.788873299 912.0  
62.815133864 942.0  
62.841394429 975.0  
62.867654994 934.0

62.893915559 948.0  
62.920176124 962.0  
62.946436689 965.0  
62.972697254 1046.0  
62.998957819 967.0  
63.025218384 930.0  
63.051478949 976.0  
63.077739514 1039.0  
63.104000079 986.0  
63.130260644 971.0  
63.156521209 1039.0  
63.182781774 1008.0  
63.209042339 1111.0  
63.235302904 1006.0  
63.261563469 1045.0  
63.287824034 1107.0  
63.314084599 1084.0  
63.340345164 1042.0  
63.366605729 1065.0  
63.392866294 1068.0  
63.419126859 1024.0  
63.445387424 1091.0  
63.471647989 1139.0  
63.497908555 1134.0  
63.524169120 1086.0  
63.550429685 1083.0  
63.576690250 1083.0  
63.602950815 1175.0  
63.629211380 1123.0  
63.655471945 1100.0  
63.681732510 1106.0  
63.707993075 1112.0  
63.734253640 1128.0  
63.760514205 1118.0  
63.786774770 1125.0  
63.813035335 1118.0  
63.839295900 1195.0  
63.865556465 1161.0  
63.891817030 1170.0  
63.918077595 1140.0  
63.944338160 1148.0  
63.970598725 1247.0  
63.996859290 1209.0  
64.023119855 1193.0  
64.049380420 1215.0  
64.075640985 1178.0  
64.101901550 1198.0  
64.128162115 1195.0  
64.154422680 1191.0  
64.180683245 1182.0  
64.206943810 1239.0  
64.233204375 1272.0  
64.259464940 1286.0  
64.285725505 1268.0  
64.311986070 1241.0  
64.338246635 1236.0  
64.364507200 1270.0  
64.390767765 1340.0

64.417028330 1321.0  
64.443288895 1325.0  
64.469549460 1305.0  
64.495810025 1327.0  
64.522070590 1432.0  
64.548331155 1472.0  
64.574591720 1393.0  
64.600852285 1395.0  
64.627112850 1432.0  
64.653373415 1440.0  
64.679633980 1481.0  
64.705894545 1480.0  
64.732155110 1465.0  
64.758415675 1456.0  
64.784676240 1517.0  
64.810936805 1449.0  
64.837197370 1427.0  
64.863457935 1457.0  
64.889718500 1445.0  
64.915979065 1404.0  
64.942239630 1394.0  
64.968500195 1416.0  
64.994760760 1407.0  
65.021021325 1327.0  
65.047281890 1315.0  
65.073542455 1364.0  
65.099803020 1366.0  
65.126063585 1314.0  
65.152324150 1238.0  
65.178584715 1284.0  
65.204845280 1128.0  
65.231105845 1225.0  
65.257366410 1130.0  
65.283626975 1206.0  
65.309887540 1120.0  
65.336148105 1125.0  
65.362408670 1135.0  
65.388669235 1110.0  
65.414929800 1122.0  
65.441190365 1092.0  
65.467450930 1120.0  
65.493711495 1051.0  
65.519972060 1036.0  
65.546232625 1059.0  
65.572493190 1057.0  
65.598753755 1026.0  
65.625014320 1082.0  
65.651274885 997.0  
65.677535450 1053.0  
65.703796015 1048.0  
65.730056580 1011.0  
65.756317145 1025.0  
65.782577710 952.0  
65.808838275 1033.0  
65.835098840 1016.0  
65.861359405 986.0  
65.887619970 1039.0  
65.913880535 933.0



65.940141100 1006.0  
65.966401665 911.0  
65.992662230 1032.0  
66.018922795 976.0  
66.045183360 1042.0  
66.071443925 1016.0  
66.097704490 1018.0  
66.123965055 1027.0  
66.150225620 1002.0  
66.176486185 931.0  
66.202746750 999.0  
66.229007315 1083.0  
66.255267880 949.0  
66.281528445 936.0  
66.307789010 1010.0  
66.334049575 962.0  
66.360310140 921.0  
66.386570705 948.0  
66.412831270 1061.0  
66.439091835 920.0  
66.465352400 949.0  
66.491612965 944.0  
66.517873531 970.0  
66.544134096 974.0  
66.570394661 977.0  
66.596655226 974.0  
66.622915791 1029.0  
66.649176356 921.0  
66.675436921 958.0  
66.701697486 993.0  
66.727958051 947.0  
66.754218616 928.0  
66.780479181 911.0  
66.806739746 900.0  
66.833000311 911.0  
66.859260876 889.0  
66.885521441 903.0  
66.911782006 922.0  
66.938042571 940.0  
66.964303136 911.0  
66.990563701 937.0  
67.016824266 938.0  
67.043084831 896.0  
67.069345396 871.0  
67.095605961 925.0  
67.121866526 888.0  
67.148127091 833.0  
67.174387656 922.0  
67.200648221 928.0  
67.226908786 906.0  
67.253169351 924.0  
67.279429916 876.0  
67.305690481 938.0  
67.331951046 895.0  
67.358211611 868.0  
67.384472176 911.0  
67.410732741 873.0  
67.436993306 873.0

67.463253871 888.0  
67.489514436 860.0  
67.515775001 848.0  
67.542035566 784.0  
67.568296131 817.0  
67.594556696 870.0  
67.620817261 878.0  
67.647077826 837.0  
67.673338391 834.0  
67.699598956 839.0  
67.725859521 840.0  
67.752120086 835.0  
67.778380651 848.0  
67.804641216 861.0  
67.830901781 854.0  
67.857162346 834.0  
67.883422911 863.0  
67.909683476 866.0  
67.935944041 818.0  
67.962204606 818.0  
67.988465171 866.0  
68.014725736 828.0  
68.040986301 824.0  
68.067246866 791.0  
68.093507431 860.0  
68.119767996 800.0  
68.146028561 732.0  
68.172289126 815.0  
68.198549691 848.0  
68.224810256 833.0  
68.251070821 795.0  
68.277331386 817.0  
68.303591951 789.0  
68.329852516 852.0  
68.356113081 751.0  
68.382373646 830.0  
68.408634211 810.0  
68.434894776 845.0  
68.461155341 805.0  
68.487415906 779.0  
68.513676471 804.0  
68.539937036 799.0  
68.566197601 789.0  
68.592458166 799.0  
68.618718731 811.0  
68.644979296 775.0  
68.671239861 783.0  
68.697500426 798.0  
68.723760991 808.0  
68.750021556 779.0  
68.776282121 808.0  
68.802542686 805.0  
68.828803251 808.0  
68.855063816 780.0  
68.881324381 820.0  
68.907584946 800.0  
68.933845511 804.0  
68.960106076 791.0

68.986366641 780.0  
69.012627206 821.0  
69.038887771 866.0  
69.065148336 812.0  
69.091408901 774.0  
69.117669466 814.0  
69.143930031 798.0  
69.170190596 778.0  
69.196451161 803.0  
69.222711726 800.0  
69.248972291 798.0  
69.275232856 758.0  
69.301493421 827.0  
69.327753986 744.0  
69.354014551 815.0  
69.380275116 859.0  
69.406535681 848.0  
69.432796246 761.0  
69.459056811 815.0  
69.485317376 842.0  
69.511577942 790.0  
69.537838507 820.0  
69.564099072 774.0  
69.590359637 808.0  
69.616620202 788.0  
69.642880767 831.0  
69.669141332 858.0  
69.695401897 831.0  
69.721662462 851.0  
69.747923027 809.0  
69.774183592 804.0  
69.800444157 812.0  
69.826704722 836.0  
69.852965287 835.0  
69.879225852 855.0  
69.905486417 877.0  
69.931746982 867.0  
69.958007547 808.0  
69.984268112 785.0  
70.010528677 821.0  
70.036789242 861.0  
70.063049807 785.0  
70.089310372 890.0  
70.115570937 828.0  
70.141831502 886.0  
70.168092067 844.0  
70.194352632 861.0  
70.220613197 848.0  
70.246873762 787.0  
70.273134327 862.0  
70.299394892 868.0  
70.325655457 847.0  
70.351916022 900.0  
70.378176587 914.0  
70.404437152 884.0  
70.430697717 809.0  
70.456958282 841.0  
70.483218847 939.0

70.509479412 867.0  
70.535739977 885.0  
70.562000542 893.0  
70.588261107 910.0  
70.614521672 818.0  
70.640782237 850.0  
70.667042802 920.0  
70.693303367 816.0  
70.719563932 894.0  
70.745824497 927.0  
70.772085062 908.0  
70.798345627 890.0  
70.824606192 913.0  
70.850866757 891.0  
70.877127322 912.0  
70.903387887 888.0  
70.929648452 944.0  
70.955909017 921.0  
70.982169582 948.0  
71.008430147 881.0  
71.034690712 910.0  
71.060951277 905.0  
71.087211842 908.0  
71.113472407 874.0  
71.139732972 910.0  
71.165993537 905.0  
71.192254102 964.0  
71.218514667 931.0  
71.244775232 943.0  
71.271035797 914.0  
71.297296362 940.0  
71.323556927 929.0  
71.349817492 959.0  
71.376078057 933.0  
71.402338622 952.0  
71.428599187 943.0  
71.454859752 932.0  
71.481120317 883.0  
71.507380882 980.0  
71.533641447 932.0  
71.559902012 978.0  
71.586162577 957.0  
71.612423142 960.0  
71.638683707 1016.0  
71.664944272 955.0  
71.691204837 1032.0  
71.717465402 977.0  
71.743725967 993.0  
71.769986532 937.0  
71.796247097 961.0  
71.822507662 983.0  
71.848768227 968.0  
71.875028792 1016.0  
71.901289357 999.0  
71.927549922 919.0  
71.953810487 955.0  
71.980071052 1000.0  
72.006331617 952.0

72.032592182 970.0  
72.058852747 955.0  
72.085113312 940.0  
72.111373877 937.0  
72.137634442 916.0  
72.163895007 948.0  
72.190155572 924.0  
72.216416137 859.0  
72.242676702 898.0  
72.268937267 979.0  
72.295197832 950.0  
72.321458397 917.0  
72.347718962 911.0  
72.373979527 870.0  
72.400240092 906.0  
72.426500657 856.0  
72.452761222 949.0  
72.479021787 870.0  
72.505282353 832.0  
72.531542918 859.0  
72.557803483 886.0  
72.584064048 875.0  
72.610324613 839.0  
72.636585178 854.0  
72.662845743 873.0  
72.689106308 832.0  
72.715366873 827.0  
72.741627438 834.0  
72.767888003 777.0  
72.794148568 852.0  
72.820409133 781.0  
72.846669698 773.0  
72.872930263 809.0  
72.899190828 847.0  
72.925451393 829.0  
72.951711958 802.0  
72.977972523 793.0  
73.004233088 782.0  
73.030493653 739.0  
73.056754218 766.0  
73.083014783 790.0  
73.109275348 744.0  
73.135535913 815.0  
73.161796478 703.0  
73.188057043 712.0  
73.214317608 712.0  
73.240578173 713.0  
73.266838738 747.0  
73.293099303 729.0  
73.319359868 702.0  
73.345620433 742.0  
73.371880998 687.0  
73.398141563 674.0  
73.424402128 745.0  
73.450662693 725.0  
73.476923258 710.0  
73.503183823 713.0  
73.529444388 614.0

73.555704953 708.0  
73.581965518 668.0  
73.608226083 672.0  
73.634486648 694.0  
73.660747213 696.0  
73.687007778 634.0  
73.713268343 639.0  
73.739528908 660.0  
73.765789473 660.0  
73.792050038 643.0  
73.818310603 638.0  
73.844571168 655.0  
73.870831733 590.0  
73.897092298 641.0  
73.923352863 677.0  
73.949613428 669.0  
73.975873993 648.0  
74.002134558 661.0  
74.028395123 689.0  
74.054655688 643.0  
74.080916253 608.0  
74.107176818 645.0  
74.133437383 610.0  
74.159697948 610.0  
74.185958513 654.0  
74.212219078 584.0  
74.238479643 613.0  
74.264740208 624.0  
74.291000773 637.0  
74.317261338 569.0  
74.343521903 647.0  
74.369782468 609.0  
74.396043033 641.0  
74.422303598 596.0  
74.448564163 596.0  
74.474824728 606.0  
74.501085293 627.0  
74.527345858 622.0  
74.553606423 582.0  
74.579866988 655.0  
74.606127553 597.0  
74.632388118 572.0  
74.658648683 605.0  
74.684909248 588.0  
74.711169813 591.0  
74.737430378 608.0  
74.763690943 605.0  
74.789951508 576.0  
74.816212073 660.0  
74.842472638 580.0  
74.868733203 563.0  
74.894993768 589.0  
74.921254333 569.0  
74.947514898 622.0  
74.973775463 558.0  
75.000036028 566.0  
75.026296593 600.0  
75.052557158 592.0

75.078817723 593.0  
75.105078288 621.0  
75.131338853 581.0  
75.157599418 580.0  
75.183859983 555.0  
75.210120548 529.0  
75.236381113 529.0  
75.262641678 604.0  
75.288902243 582.0  
75.315162808 603.0  
75.341423373 607.0  
75.367683938 568.0  
75.393944503 541.0  
75.420205068 588.0  
75.446465633 553.0  
75.472726198 559.0  
75.498986764 612.0  
75.525247329 576.0  
75.551507894 560.0  
75.577768459 595.0  
75.604029024 596.0  
75.630289589 568.0  
75.656550154 577.0  
75.682810719 564.0  
75.709071284 679.0  
75.735331849 608.0  
75.761592414 590.0  
75.787852979 561.0  
75.814113544 584.0  
75.840374109 559.0  
75.866634674 603.0  
75.892895239 571.0  
75.919155804 577.0  
75.945416369 542.0  
75.971676934 560.0  
75.997937499 559.0  
76.024198064 528.0  
76.050458629 556.0  
76.076719194 542.0  
76.102979759 566.0  
76.129240324 523.0  
76.155500889 580.0  
76.181761454 579.0  
76.208022019 556.0  
76.234282584 549.0  
76.260543149 565.0  
76.286803714 557.0  
76.313064279 510.0  
76.339324844 612.0  
76.365585409 579.0  
76.391845974 560.0  
76.418106539 538.0  
76.444367104 569.0  
76.470627669 590.0  
76.496888234 547.0  
76.523148799 526.0  
76.549409364 617.0  
76.575669929 600.0

76.601930494 540.0  
76.628191059 576.0  
76.654451624 620.0  
76.680712189 567.0  
76.706972754 532.0  
76.733233319 522.0  
76.759493884 544.0  
76.785754449 580.0  
76.812015014 512.0  
76.838275579 549.0  
76.864536144 566.0  
76.890796709 578.0  
76.917057274 585.0  
76.943317839 561.0  
76.969578404 570.0  
76.995838969 545.0  
77.022099534 539.0  
77.048360099 608.0  
77.074620664 543.0  
77.100881229 554.0  
77.127141794 530.0  
77.153402359 547.0  
77.179662924 506.0  
77.205923489 583.0  
77.232184054 592.0  
77.258444619 582.0  
77.284705184 593.0  
77.310965749 591.0  
77.337226314 567.0  
77.363486879 533.0  
77.389747444 556.0  
77.416008009 591.0  
77.442268574 570.0  
77.468529139 538.0  
77.494789704 534.0  
77.521050269 556.0  
77.547310834 564.0  
77.573571399 538.0  
77.599831964 574.0  
77.626092529 566.0  
77.652353094 485.0  
77.678613659 540.0  
77.704874224 542.0  
77.731134789 598.0  
77.757395354 588.0  
77.783655919 552.0  
77.809916484 626.0  
77.836177049 546.0  
77.862437614 511.0  
77.888698179 543.0  
77.914958744 579.0  
77.941219309 574.0  
77.967479874 565.0  
77.993740439 572.0  
78.020001004 580.0  
78.046261569 542.0  
78.072522134 596.0  
78.098782699 564.0



78.125043264 560.0  
78.151303829 584.0  
78.177564394 514.0  
78.203824959 555.0  
78.230085524 568.0  
78.256346089 544.0  
78.282606654 527.0  
78.308867219 633.0  
78.335127784 600.0  
78.361388349 545.0  
78.387648914 600.0  
78.413909479 528.0  
78.440170044 540.0  
78.466430609 621.0  
78.492691175 542.0  
78.518951740 602.0  
78.545212305 579.0  
78.571472870 611.0  
78.597733435 582.0  
78.623994000 632.0  
78.650254565 554.0  
78.676515130 593.0  
78.702775695 585.0  
78.729036260 576.0  
78.755296825 612.0  
78.781557390 584.0  
78.807817955 577.0  
78.834078520 615.0  
78.860339085 565.0  
78.886599650 605.0  
78.912860215 620.0  
78.939120780 582.0  
78.965381345 640.0  
78.991641910 604.0  
79.017902475 560.0  
79.044163040 579.0  
79.070423605 583.0  
79.096684170 619.0  
79.122944735 575.0  
79.149205300 602.0  
79.175465865 581.0  
79.201726430 600.0  
79.227986995 613.0  
79.254247560 571.0  
79.280508125 594.0  
79.306768690 607.0  
79.333029255 640.0  
79.359289820 631.0  
79.385550385 610.0  
79.411810950 570.0  
79.438071515 599.0  
79.464332080 607.0  
79.490592645 618.0  
79.516853210 583.0  
79.543113775 576.0  
79.569374340 580.0  
79.595634905 595.0  
79.621895470 624.0

79.648156035 612.0  
79.674416600 595.0  
79.700677165 622.0  
79.726937730 550.0  
79.753198295 640.0  
79.779458860 565.0  
79.805719425 589.0  
79.831979990 574.0  
79.858240555 609.0  
79.884501120 567.0  
79.910761685 571.0  
79.937022250 594.0  
79.963282815 615.0  
79.989543380 544.0  
80.015803945 523.0  
80.042064510 590.0  
80.068325075 588.0  
80.094585640 598.0  
80.120846205 589.0  
80.147106770 561.0  
80.173367335 616.0  
80.199627900 561.0  
80.225888465 592.0  
80.252149030 627.0  
80.278409595 588.0  
80.304670160 529.0  
80.330930725 590.0  
80.357191290 642.0  
80.383451855 585.0  
80.409712420 603.0  
80.435972985 582.0  
80.462233550 576.0  
80.488494115 569.0  
80.514754680 563.0  
80.541015245 606.0  
80.567275810 565.0  
80.593536375 653.0  
80.619796940 583.0  
80.646057505 587.0  
80.672318070 603.0  
80.698578635 590.0  
80.724839200 591.0  
80.751099765 606.0  
80.777360330 568.0  
80.803620895 579.0  
80.829881460 588.0  
80.856142025 614.0  
80.882402590 633.0  
80.908663155 540.0  
80.934923720 605.0  
80.961184285 574.0  
80.987444850 590.0  
81.013705415 650.0  
81.039965980 597.0  
81.066226545 629.0  
81.092487110 613.0  
81.118747675 604.0  
81.145008240 583.0

81.171268805 599.0  
81.197529370 624.0  
81.223789935 631.0  
81.250050500 612.0  
81.276311065 612.0  
81.302571630 586.0  
81.328832195 592.0  
81.355092760 641.0  
81.381353325 565.0  
81.407613890 597.0  
81.433874455 572.0  
81.460135020 606.0  
81.486395585 570.0  
81.512656151 573.0  
81.538916716 569.0  
81.565177281 602.0  
81.591437846 571.0  
81.617698411 625.0  
81.643958976 571.0  
81.670219541 596.0  
81.696480106 607.0  
81.722740671 615.0  
81.749001236 593.0  
81.775261801 604.0  
81.801522366 579.0  
81.827782931 599.0  
81.854043496 570.0  
81.880304061 575.0  
81.906564626 579.0  
81.932825191 614.0  
81.959085756 544.0  
81.985346321 551.0  
82.011606886 606.0  
82.037867451 601.0  
82.064128016 534.0  
82.090388581 581.0  
82.116649146 561.0  
82.142909711 597.0  
82.169170276 596.0  
82.195430841 565.0  
82.221691406 620.0  
82.247951971 535.0  
82.274212536 550.0  
82.300473101 583.0  
82.326733666 572.0  
82.352994231 531.0  
82.379254796 631.0  
82.405515361 606.0  
82.431775926 574.0  
82.458036491 568.0  
82.484297056 611.0  
82.510557621 528.0  
82.536818186 594.0  
82.563078751 535.0  
82.589339316 567.0  
82.615599881 596.0  
82.641860446 567.0  
82.668121011 556.0

82.694381576 591.0  
82.720642141 576.0  
82.746902706 596.0  
82.773163271 563.0  
82.799423836 607.0  
82.825684401 586.0  
82.851944966 563.0  
82.878205531 634.0  
82.904466096 570.0  
82.930726661 554.0  
82.956987226 571.0  
82.983247791 565.0  
83.009508356 546.0  
83.035768921 564.0  
83.062029486 566.0  
83.088290051 578.0  
83.114550616 536.0  
83.140811181 622.0  
83.167071746 578.0  
83.193332311 561.0  
83.219592876 573.0  
83.245853441 528.0  
83.272114006 546.0  
83.298374571 568.0  
83.324635136 599.0  
83.350895701 556.0  
83.377156266 566.0  
83.403416831 533.0  
83.429677396 564.0  
83.455937961 570.0  
83.482198526 563.0  
83.508459091 578.0  
83.534719656 576.0  
83.560980221 613.0  
83.587240786 547.0  
83.613501351 523.0  
83.639761916 478.0  
83.666022481 556.0  
83.692283046 584.0  
83.718543611 573.0  
83.744804176 543.0  
83.771064741 584.0  
83.797325306 552.0  
83.823585871 589.0  
83.849846436 613.0  
83.876107001 574.0  
83.902367566 547.0  
83.928628131 595.0  
83.954888696 604.0  
83.981149261 572.0  
84.007409826 534.0  
84.033670391 554.0  
84.059930956 571.0  
84.086191521 625.0  
84.112452086 570.0  
84.138712651 537.0  
84.164973216 575.0  
84.191233781 548.0

84.217494346 578.0  
84.243754911 589.0  
84.270015476 532.0  
84.296276041 592.0  
84.322536606 594.0  
84.348797171 601.0  
84.375057736 521.0  
84.401318301 564.0  
84.427578866 559.0  
84.453839431 594.0  
84.480099996 551.0  
84.506360562 567.0  
84.532621127 591.0  
84.558881692 559.0  
84.585142257 516.0  
84.611402822 597.0  
84.637663387 591.0  
84.663923952 587.0  
84.690184517 589.0  
84.716445082 622.0  
84.742705647 612.0  
84.768966212 637.0  
84.795226777 622.0  
84.821487342 581.0  
84.847747907 604.0  
84.874008472 657.0  
84.900269037 625.0  
84.926529602 611.0  
84.952790167 636.0  
84.979050732 543.0  
85.005311297 601.0  
85.031571862 644.0  
85.057832427 606.0  
85.084092992 709.0  
85.110353557 650.0  
85.136614122 667.0  
85.162874687 666.0  
85.189135252 696.0  
85.215395817 670.0  
85.241656382 670.0  
85.267916947 664.0  
85.294177512 693.0  
85.320438077 715.0  
85.346698642 759.0  
85.372959207 681.0  
85.399219772 693.0  
85.425480337 712.0  
85.451740902 697.0  
85.478001467 771.0  
85.504262032 741.0  
85.530522597 694.0  
85.556783162 693.0  
85.583043727 729.0  
85.609304292 729.0  
85.635564857 713.0  
85.661825422 711.0  
85.688085987 667.0  
85.714346552 657.0

85.740607117 716.0  
85.766867682 646.0  
85.793128247 663.0  
85.819388812 599.0  
85.845649377 685.0  
85.871909942 673.0  
85.898170507 661.0  
85.924431072 694.0  
85.950691637 624.0  
85.976952202 623.0  
86.003212767 647.0  
86.029473332 673.0  
86.055733897 624.0  
86.081994462 644.0  
86.108255027 618.0  
86.134515592 622.0  
86.160776157 678.0  
86.187036722 646.0  
86.213297287 649.0  
86.239557852 643.0  
86.265818417 605.0  
86.292078982 606.0  
86.318339547 610.0  
86.344600112 568.0  
86.370860677 585.0  
86.397121242 630.0  
86.423381807 610.0  
86.449642372 573.0  
86.475902937 589.0  
86.502163502 592.0  
86.528424067 626.0  
86.554684632 614.0  
86.580945197 583.0  
86.607205762 580.0  
86.633466327 645.0  
86.659726892 566.0  
86.685987457 579.0  
86.712248022 568.0  
86.738508587 522.0  
86.764769152 561.0  
86.791029717 551.0  
86.817290282 579.0  
86.843550847 544.0  
86.869811412 590.0  
86.896071977 596.0  
86.922332542 566.0  
86.948593107 628.0  
86.974853672 595.0  
87.001114237 597.0  
87.027374802 571.0  
87.053635367 562.0  
87.079895932 540.0  
87.106156497 514.0  
87.132417062 580.0  
87.158677627 542.0  
87.184938192 524.0  
87.211198757 565.0  
87.237459322 548.0

87.263719887 556.0  
87.289980452 562.0  
87.316241017 521.0  
87.342501582 597.0  
87.368762147 606.0  
87.395022712 563.0  
87.421283277 546.0  
87.447543842 539.0  
87.473804407 536.0  
87.500064973 577.0  
87.526325538 472.0  
87.552586103 517.0  
87.578846668 508.0  
87.605107233 539.0  
87.631367798 517.0  
87.657628363 509.0  
87.683888928 552.0  
87.710149493 542.0  
87.736410058 520.0  
87.762670623 488.0  
87.788931188 506.0  
87.815191753 493.0  
87.841452318 468.0  
87.867712883 510.0  
87.893973448 504.0  
87.920234013 513.0  
87.946494578 540.0  
87.972755143 506.0  
87.999015708 475.0  
88.025276273 471.0  
88.051536838 541.0  
88.077797403 506.0  
88.104057968 458.0  
88.130318533 433.0  
88.156579098 493.0  
88.182839663 463.0  
88.209100228 479.0  
88.235360793 470.0  
88.261621358 463.0  
88.287881923 503.0  
88.314142488 495.0  
88.340403053 473.0  
88.366663618 446.0  
88.392924183 496.0  
88.419184748 458.0  
88.445445313 458.0  
88.471705878 442.0  
88.497966443 501.0  
88.524227008 457.0  
88.550487573 454.0  
88.576748138 496.0  
88.603008703 510.0  
88.629269268 422.0  
88.655529833 439.0  
88.681790398 480.0  
88.708050963 462.0  
88.734311528 481.0  
88.760572093 521.0

88.786832658 469.0  
88.813093223 499.0  
88.839353788 449.0  
88.865614353 455.0  
88.891874918 521.0  
88.918135483 478.0  
88.944396048 431.0  
88.970656613 461.0  
88.996917178 435.0  
89.023177743 453.0  
89.049438308 491.0  
89.075698873 468.0  
89.101959438 448.0  
89.128220003 453.0  
89.154480568 430.0  
89.180741133 424.0  
89.207001698 444.0  
89.233262263 455.0  
89.259522828 447.0  
89.285783393 450.0  
89.312043958 510.0  
89.338304523 446.0  
89.364565088 453.0  
89.390825653 489.0  
89.417086218 423.0  
89.443346783 454.0  
89.469607348 448.0  
89.495867913 453.0  
89.522128478 460.0  
89.548389043 422.0  
89.574649608 433.0  
89.600910173 456.0  
89.627170738 451.0  
89.653431303 448.0  
89.679691868 403.0  
89.705952433 447.0  
89.732212998 443.0  
89.758473563 466.0  
89.784734128 444.0  
89.810994693 456.0  
89.837255258 440.0  
89.863515823 461.0  
89.889776388 451.0  
89.916036953 442.0  
89.942297518 442.0  
89.968558083 440.0  
89.994818648 464.0  
90.021079213 418.0  
90.047339778 421.0  
90.073600343 442.0  
90.099860908 442.0  
90.126121473 437.0  
90.152382038 429.0  
90.178642603 456.0  
90.204903168 462.0  
90.231163733 461.0  
90.257424298 459.0  
90.283684863 478.0



90.309945428 435.0  
90.336205993 455.0  
90.362466558 447.0  
90.388727123 392.0  
90.414987688 426.0  
90.441248253 439.0  
90.467508818 402.0  
90.493769384 422.0  
90.520029949 408.0  
90.546290514 406.0  
90.572551079 465.0  
90.598811644 453.0  
90.625072209 502.0  
90.651332774 463.0  
90.677593339 442.0  
90.703853904 430.0  
90.730114469 459.0  
90.756375034 445.0  
90.782635599 463.0  
90.808896164 426.0  
90.835156729 418.0  
90.861417294 405.0  
90.887677859 448.0  
90.913938424 411.0  
90.940198989 448.0  
90.966459554 436.0  
90.992720119 467.0  
91.018980684 433.0  
91.045241249 430.0  
91.071501814 430.0  
91.097762379 447.0  
91.124022944 428.0  
91.150283509 454.0  
91.176544074 431.0  
91.202804639 443.0  
91.229065204 473.0  
91.255325769 459.0  
91.281586334 423.0  
91.307846899 404.0  
91.334107464 481.0  
91.360368029 434.0  
91.386628594 478.0  
91.412889159 445.0  
91.439149724 421.0  
91.465410289 440.0  
91.491670854 410.0  
91.517931419 421.0  
91.544191984 501.0  
91.570452549 418.0  
91.596713114 430.0  
91.622973679 498.0  
91.649234244 454.0  
91.675494809 413.0  
91.701755374 450.0  
91.728015939 451.0  
91.754276504 439.0  
91.780537069 452.0  
91.806797634 423.0

91.833058199 461.0  
91.859318764 422.0  
91.885579329 446.0  
91.911839894 430.0  
91.938100459 444.0  
91.964361024 436.0  
91.990621589 382.0  
92.016882154 484.0  
92.043142719 423.0  
92.069403284 388.0  
92.095663849 443.0  
92.121924414 444.0  
92.148184979 428.0  
92.174445544 425.0  
92.200706109 442.0  
92.226966674 464.0  
92.253227239 448.0  
92.279487804 456.0  
92.305748369 471.0  
92.332008934 434.0  
92.358269499 452.0  
92.384530064 436.0  
92.410790629 447.0  
92.437051194 452.0  
92.463311759 485.0  
92.489572324 454.0  
92.515832889 446.0  
92.542093454 455.0  
92.568354019 458.0  
92.594614584 435.0  
92.620875149 437.0  
92.647135714 429.0  
92.673396279 461.0  
92.699656844 437.0  
92.725917409 419.0  
92.752177974 443.0  
92.778438539 500.0  
92.804699104 454.0  
92.830959669 412.0  
92.857220234 478.0  
92.883480799 426.0  
92.909741364 464.0  
92.936001929 442.0  
92.962262494 450.0  
92.988523059 446.0  
93.014783624 468.0  
93.041044189 417.0  
93.067304754 452.0  
93.093565319 413.0  
93.119825884 424.0  
93.146086449 462.0  
93.172347014 434.0  
93.198607579 455.0  
93.224868144 452.0  
93.251128709 445.0  
93.277389274 478.0  
93.303649839 437.0  
93.329910404 427.0

93.356170969 409.0  
93.382431534 459.0  
93.408692099 402.0  
93.434952664 457.0  
93.461213229 434.0  
93.487473795 515.0  
93.513734360 476.0  
93.539994925 426.0  
93.566255490 437.0  
93.592516055 452.0  
93.618776620 452.0  
93.645037185 410.0  
93.671297750 461.0  
93.697558315 437.0  
93.723818880 488.0  
93.750079445 446.0  
93.776340010 422.0  
93.802600575 457.0  
93.828861140 462.0  
93.855121705 485.0  
93.881382270 439.0  
93.907642835 437.0  
93.933903400 513.0  
93.960163965 443.0  
93.986424530 423.0  
94.012685095 411.0  
94.038945660 444.0  
94.065206225 479.0  
94.091466790 441.0  
94.117727355 455.0  
94.143987920 447.0  
94.170248485 477.0  
94.196509050 460.0  
94.222769615 407.0  
94.249030180 500.0  
94.275290745 454.0  
94.301551310 488.0  
94.327811875 436.0  
94.354072440 476.0  
94.380333005 422.0  
94.406593570 450.0  
94.432854135 429.0  
94.459114700 444.0  
94.485375265 412.0  
94.511635830 439.0  
94.537896395 434.0  
94.564156960 459.0  
94.590417525 485.0  
94.616678090 502.0  
94.642938655 458.0  
94.669199220 460.0  
94.695459785 425.0  
94.721720350 450.0  
94.747980915 478.0  
94.774241480 446.0  
94.800502045 481.0  
94.826762610 433.0  
94.853023175 422.0

|              |       |
|--------------|-------|
| 94.879283740 | 478.0 |
| 94.905544305 | 466.0 |
| 94.931804870 | 482.0 |
| 94.958065435 | 474.0 |
| 94.984326000 | 461.0 |
